# Supplementary material
Source: PubMed Central journal article supplement (PMC4878679)
Supplement: NIHMS786226-supplement-1.pdf [file NIHMS786226-supplement-1.pdf]

## Supplementary information

Cooperation between two periplasmic copper chaperones is required for full activity of the *cbb*<sub>3</sub>-type cytochrome *c* oxidase and copper homeostasis in *Rhodobacter capsulatus*

Petru-Iulian Trasnea<sup>a,b</sup>, Marcel Utz<sup>a</sup>, Bahia Khalfaoui-Hassani<sup>c</sup>, Simon Lagies<sup>a</sup>, Fevzi Daldal<sup>c</sup>  
and Hans-Georg Koch<sup>a,\*</sup>

<sup>a</sup>Institut für Biochemie und Molekularbiologie, ZBMZ, Stefan-Meier-Strasse 17 and <sup>b</sup>Fakultät für Biologie; Albert-Ludwigs-Universität Freiburg, 79104 Freiburg, Germany; <sup>c</sup>Department of Biology, University of Pennsylvania, Philadelphia, Pennsylvania 19104, USA.

**Running title:** PccA-SenC interactions determine *cbb*<sub>3</sub>-Cox biogenesis

**Key words:** *cbb*<sub>3</sub>-type cytochrome *c* oxidase biogenesis, periplasmic copper chaperones, copper homeostasis, respiration, *Rhodobacter capsulatus*

\*Corresponding author: Phone 0049-761-203-5250

Fax 0049-761-203-5289

Email: Hans-Georg.Koch@biochemie.uni-freiburg.de

**Supplementary Table 1: Strains and plasmids used in this study**

| Strain or plasmid             | Description                                                                                                                               | Phenotype                                | Reference                      |
|-------------------------------|-------------------------------------------------------------------------------------------------------------------------------------------|------------------------------------------|--------------------------------|
| <i>Escherichia coli</i>       |                                                                                                                                           |                                          |                                |
| DH5 $\alpha$                  |                                                                                                                                           |                                          | (Hanahan, 1983)                |
| HB101                         | F <sup>-</sup> $\Delta(gpt-proA)62 leuB6 supE44 ara-14 galK2 lacY 1 \Delta(mcrC-mrr) rpsL20$ (Str <sup>R</sup> ) <i>xyl-5 mtl-1recA13</i> | Str <sup>r</sup>                         | (Sambrook & Russel, 2001)      |
| BL21(DE3)                     |                                                                                                                                           |                                          | Stratagene Inc.                |
| <i>Rhodobacter capsulatus</i> |                                                                                                                                           |                                          |                                |
| MT1131                        |                                                                                                                                           | Wild-type, NAD <sup>I</sup> <sup>+</sup> | (Daldal <i>et al.</i> , 1986)  |
| SB1003                        |                                                                                                                                           | Wild-type NAD <sup>I</sup> <sup>+</sup>  | (Yen <i>et al.</i> , 1976)     |
| GK32                          | $\Delta ccoNO::kan$                                                                                                                       | NAD <sup>I</sup> <sup>-</sup>            | (Koch <i>et al.</i> , 1998)    |
| Y262                          |                                                                                                                                           | GTA overproducer                         | (Yen <i>et al.</i> , 1979)     |
| CW1                           | $\Delta ccoGHIS::spe$                                                                                                                     | NAD <sup>I</sup> <sup>-</sup>            | (Koch <i>et al.</i> , 2000)    |
| LS01                          | $\Delta senC$                                                                                                                             | NAD <sup>I</sup> <sup>-</sup>            | (Swem <i>et al.</i> , 2005)    |
| IT1                           | $\Delta PccA::kan$                                                                                                                        | Km <sup>r</sup>                          | This work                      |
| IT10                          | $\Delta senC \Delta(PccA::kan)$                                                                                                           | Km <sup>r</sup>                          | This work                      |
| <i>plasmids</i>               |                                                                                                                                           |                                          |                                |
| pRK2013                       | Conjugation helper plasmid                                                                                                                | Km <sup>r</sup>                          | (Ditta <i>et al.</i> , 1985)   |
| pRK415                        | Broad host-range vector                                                                                                                   | Tet <sup>r</sup>                         | (Ditta <i>et al.</i> , 1985)   |
| pBluescript II KS+            | Cloning vector                                                                                                                            | Amp <sup>r</sup>                         | Stratagene Inc.                |
| pBS_PccA                      | PccA cloned into SacI and KpnI sites of pBlueScript                                                                                       | Amp <sup>r</sup>                         | This work                      |
| pRK415_PccA                   | PccA cloned into SacI and KpnI sites of pRK415                                                                                            | Tet <sup>r</sup>                         | This work                      |
| pBS_ΔPccA                     | 2,2 SacI-KpnI fragment carrying the $\Delta(PccA::kan)$ allele on pBlueScript                                                             | Amp <sup>r</sup>                         | This work                      |
| pRK415_ΔPccA                  | 2,2 SacI-KpnI fragment carrying the $\Delta(PccA::kan)$ allele on pRK415                                                                  | Tet <sup>r</sup>                         | This work                      |
| pET22b_PccA Strep             | PccA cloned in pET22b for in vivo overexpression                                                                                          | Amp <sup>r</sup>                         | This work                      |
| pET22b_PccA StrepΔM           | PccA cloned in pET22b with the mutated copper binding motif, for in vivo overexpression                                                   | Amp <sup>r</sup>                         | This work                      |
| pTFD342                       | <i>rnfA</i> '160:: <i>phoA</i> '                                                                                                          | Tet <sup>r</sup>                         | (Kumagai <i>et al.</i> , 1997) |
| pBK86                         | CcoAH249:: <i>PhoA</i> in pTFD342                                                                                                         | Tet <sup>r</sup>                         | This work                      |
| pBK88                         | CcoAR281:: <i>PhoA</i> in pTFD342                                                                                                         | Tet <sup>r</sup>                         | This work                      |

**Supplementary Table 2. Primers used in this work**

| Primer name        | Sequence 5'- 3'                             | Description                                                                   |                                                                              |
|--------------------|---------------------------------------------|-------------------------------------------------------------------------------|------------------------------------------------------------------------------|
| PccA sacI for      | ccagcttgaagagctcgatcaccacatc                | Deletion of PccA with the downstream and upstream regions from MT1131         |                                                                              |
| PccA KpnI rev      | gcaacatctatgggtaccgcaaccag                  |                                                                               |                                                                              |
| pB_circ_upII       | ttctctcatatgatcgcgcc                        | Deletion of PccA from pBS-PccA plasmid                                        |                                                                              |
| pB_circ_downIII    | gaacctggctcctcgagcatg                       |                                                                               |                                                                              |
| pKD_kan_for        | ctactggcatatgtggaaa                         | Amplification of Kanamycin cassette from pKD4 plasmid                         |                                                                              |
| pKD_kan_rev        | aagctcgagctttcatagaa                        |                                                                               |                                                                              |
| PccA strep For     | cagttcgaaaagtgagctgctaacaaagcccg            | Strep tag addition for <i>in vivo</i> expression                              |                                                                              |
| PccA strep Rev     | cgggtggctccactcgaggggggtcatctt              |                                                                               |                                                                              |
| PccAM76C Mut1_for  | gcgatggcgtgatgcattcgagc                     | Insertion of four cysteine residues at the PccA positions 76, 93, 109 and 117 |                                                                              |
| PccAM76C Mut1_rev  | ggcgaaatcgacctgaccgc                        |                                                                               |                                                                              |
| PccAV93C Mut2_for  | accgggatgatcgattcgggcgcg                    |                                                                               |                                                                              |
| PccAV93C Mut2_rev  | cacgcccgggcatcggt                           |                                                                               |                                                                              |
| PccAG109C Mut3_for | aaactggcgccgctgcccggctg                     |                                                                               |                                                                              |
| PccAG109C Mut3_rev | caccgtgcccccgcccggc                         |                                                                               |                                                                              |
| PccAG117C Mut4_for | gcgccgatcgccgaaggggtg                       |                                                                               |                                                                              |
| PccAG117C Mut4_rev | ggtcaggcacatgaacatcac                       |                                                                               |                                                                              |
| PccA M90L For      | cccggctgatcgatgctggc                        |                                                                               | Replacement of two methionine residues from the copper binding motif of PccA |
| PccA M90L Rev      | tcacgcccgcggcatcggt                         |                                                                               |                                                                              |
| PccA M114L For     | cgggctgcatgtgctgttcatg                      |                                                                               |                                                                              |
| PccA M114L Rev     | cccggcgccagtttccac                          |                                                                               |                                                                              |
| CcoA-XhoI-F        | cgcgccagcgcctcgagatagcgcacct                | <i>ccoA::phoA</i> fusion                                                      |                                                                              |
| CcoA-BamHI249-R    | cgatgctggcggcattcggatccgtgtggcccagcccacca   |                                                                               |                                                                              |
| CcoA-BamHI281-R    | aaaagaccaatgccgacaatgggatcccggccaaagcgggcaa |                                                                               |                                                                              |

## References for Supplementary Material

- Daldal, F., S. Cheng, J. Applebaum, E. Davidson & R.C. Prince, (1986) Cytochrome c2 is not essential for phototrophic growth of *Rhodospseudomonas capsulata*. *Proc. Natl Acad. Sci USA* **83**: 2012-2016.
- Ditta, G., T. Schmidhauser, E. Jacobson, P. Lu, X.-W. Liang, D.R. Finlay, D. Guiney & D.R. Helinski, (1985) Plasmids related to the broad host range vector, pRK290, useful for cloning and for monitoring gene expression. . *Plasmid* **13**: 149-153.
- Hanahan, D., (1983) Studies on transformation of *Escherichia coli* with plasmids. *Journal of molecular biology* **166**: 557-580.
- Koch, H.G., O. Hwang & F. Daldal, (1998) Isolation and characterization of *Rhodobacter capsulatus* mutants affected in cytochrome cbb3 oxidase activity. *Journal of bacteriology* **180**: 969-978.
- Koch, H.G., C. Winterstein, A.S. Saribas, J.O. Alben & F. Daldal, (2000) Roles of the ccoGHIS gene products in the biogenesis of the cbb(3)-type cytochrome c oxidase. *Journal of molecular biology* **297**: 49-65.
- Kumagai, H., T. Fujiwara, H. Matsubara & K. Saeki, (1997) Membrane localization, topology, and mutual stabilization of the rnfABC gene products in *Rhodobacter capsulatus* and implications for a new family of energy-coupling NADH oxidoreductases. *Biochemistry* **36**: 5509-5521.
- Sambrook, J. & D.W. Russel, (2001) *Molecular Cloning*. In.: Cold Spring Harbor Laboratory, pp.
- Swem, D.L., L.R. Swem, A. Setterdahl & C.E. Bauer, (2005) Involvement of SenC in assembly of cytochrome c oxidase in *Rhodobacter capsulatus*. *Journal of bacteriology* **187**: 8081-8087.
- Yen, H.C., N.T. YHu & B.L. Marrs, (1979) Characterization of the gene transfer agent made by an overproducer mutant of *Rhodospseudomonas capsulata*. *J. Mol. Biol.* **131**: 157-168.
- Yen, H.C., & B. Marrs, (1976) Map of genes for carotenoid and bacteriochlorophyll biosynthesis in *Rhodospseudomonas capsulata*. *Journal of bacteriology* **126**:619-629.
